# Supplementary material for: Impact of prenatal diagnosis on survival of newborns with four congenital heart defects: a prospective, population-based cohort study in France (the EPICARD Study)
Source: PubMed Central journal article supplement — BMJ Open. 2017 Nov 8;7(11):e018285. doi: 10.1136/bmjopen-2017-018285 (PMC5695380; doi:10.1136/bmjopen-2017-018285), 2017-11-08
Supplement: bmjopen-2017-018285.draft_revisions.pdf [file bmjopen-2017-018285.draft_revisions.pdf]

# BMJ Open

BMJ Open is committed to open peer review. As part of this commitment we make the peer review history of every article we publish publicly available.

When an article is published we post the peer reviewers' comments and the authors' responses online. We also post the versions of the paper that were used during peer review. These are the versions that the peer review comments apply to.

The versions of the paper that follow are the versions that were submitted during the peer review process. They are not the versions of record or the final published versions. They should not be cited or distributed as the published version of this manuscript.

BMJ Open is an open access journal and the full, final, typeset and author-corrected version of record of the manuscript is available on our site with no access controls, subscription charges or pay-per-view fees (<http://bmjopen.bmj.com>).

If you have any questions on BMJ Open's open peer review process please email [editorial.bmjopen@bmj.com](mailto:editorial.bmjopen@bmj.com)

# BMJ Open

## Impact of prenatal diagnosis on survival of newborns with four congenital heart defects: Population-based cohort study

|                                 |                                                                                                                                                                                                                                                                                                                                                                                                                                                                                                                                                                                                                                                                                                                                                                                                                                                                                                                                                                                                                                                                                                                                                                                                                                                                                                                                               |
|---------------------------------|-----------------------------------------------------------------------------------------------------------------------------------------------------------------------------------------------------------------------------------------------------------------------------------------------------------------------------------------------------------------------------------------------------------------------------------------------------------------------------------------------------------------------------------------------------------------------------------------------------------------------------------------------------------------------------------------------------------------------------------------------------------------------------------------------------------------------------------------------------------------------------------------------------------------------------------------------------------------------------------------------------------------------------------------------------------------------------------------------------------------------------------------------------------------------------------------------------------------------------------------------------------------------------------------------------------------------------------------------|
| Journal:                        | <i>BMJ Open</i>                                                                                                                                                                                                                                                                                                                                                                                                                                                                                                                                                                                                                                                                                                                                                                                                                                                                                                                                                                                                                                                                                                                                                                                                                                                                                                                               |
| Manuscript ID                   | bmjopen-2017-018285                                                                                                                                                                                                                                                                                                                                                                                                                                                                                                                                                                                                                                                                                                                                                                                                                                                                                                                                                                                                                                                                                                                                                                                                                                                                                                                           |
| Article Type:                   | Research                                                                                                                                                                                                                                                                                                                                                                                                                                                                                                                                                                                                                                                                                                                                                                                                                                                                                                                                                                                                                                                                                                                                                                                                                                                                                                                                      |
| Date Submitted by the Author:   | 19-Jun-2017                                                                                                                                                                                                                                                                                                                                                                                                                                                                                                                                                                                                                                                                                                                                                                                                                                                                                                                                                                                                                                                                                                                                                                                                                                                                                                                                   |
| Complete List of Authors:       | <p>Khoshnood, Babak; INSERM UMR 1153, Obstetrical, Perinatal and Pediatric Epidemiology Research Team (EPOPé), Center for Epidemiology and Statistics, Sorbonne Paris Cité (CRESS), DHU Risks in Pregnancy, Paris Descartes University, Paris, France</p> <p>Lelong, Nathalie; INSERM UMR 1153, Obstetrical, Perinatal and Pediatric Epidemiology Research Team (EPOPé), Center for Epidemiology and Statistics, Sorbonne Paris Cité (CRESS), DHU Risks in Pregnancy, Paris Descartes University, Paris, France</p> <p>Houyel, Lucile; Service de chirurgie des cardiopathies congénitales, Hôpital Marie Lannelongue,</p> <p>Bonnet, Damien; Centre de référence M3C-Necker, Université Paris Descartes, 140 rue de Sèvres, 75015 Paris, France,</p> <p>Ballon, Morgane; INSERM UMR 1153, Obstetrical, Perinatal and Pediatric Epidemiology Research Team (EPOPé), Center for Epidemiology and Statistics, Sorbonne Paris Cité (CRESS), DHU Risks in Pregnancy, Paris Descartes University, Paris, France</p> <p>Jouannic, Jean-Marie; Hôpital Trousseau, AP-HP, Centre pluridisciplinaire de diagnostic prénatal, UPMC</p> <p>Goffinet, François; Maternité de Port-Royal, Groupe Hospitalier Cochin-Broca-Hôtel Dieu, Université Paris Descartes, Assistance Publique-Hôpitaux de Paris, 53 av. de l'Observatoire, 75014 Paris, France</p> |
| <b>Primary Subject Heading</b>: | Cardiovascular medicine                                                                                                                                                                                                                                                                                                                                                                                                                                                                                                                                                                                                                                                                                                                                                                                                                                                                                                                                                                                                                                                                                                                                                                                                                                                                                                                       |
| Secondary Subject Heading:      | Epidemiology                                                                                                                                                                                                                                                                                                                                                                                                                                                                                                                                                                                                                                                                                                                                                                                                                                                                                                                                                                                                                                                                                                                                                                                                                                                                                                                                  |
| Keywords:                       | Congenital heart disease < CARDIOLOGY, EPIDEMIOLOGY, Prenatal diagnosis < OBSTETRICS                                                                                                                                                                                                                                                                                                                                                                                                                                                                                                                                                                                                                                                                                                                                                                                                                                                                                                                                                                                                                                                                                                                                                                                                                                                          |
|                                 |                                                                                                                                                                                                                                                                                                                                                                                                                                                                                                                                                                                                                                                                                                                                                                                                                                                                                                                                                                                                                                                                                                                                                                                                                                                                                                                                               |

SCHOLARONE™  
Manuscripts

1  
2  
3  
4  
5  
6 Impact of prenatal diagnosis on survival of newborns with four congenital heart defects:  
7 Population-based cohort study  
8  
9

10  
11  
12 Babak Khoshnood<sup>1</sup>, Nathalie Lelong<sup>1</sup>, Lucile Houyel<sup>2</sup>, Damien Bonnet<sup>3</sup>, Morgane Ballon<sup>1</sup>,  
13 Jean-Marie Jouannic<sup>4</sup> and François Goffinet<sup>1,5</sup> on behalf of the EPICARD Study Group  
14  
15

16  
17 1. INSERM UMR 1153, Obstetrical, Perinatal and Pediatric Epidemiology Research Team  
18 (EPOPé), Center for Epidemiology and Statistics, Sorbonne Paris Cité (CRESS), DHU Risks in  
19 Pregnancy, Paris Descartes University, Paris, France  
20

21 2. Congenital heart defects surgery unit, Marie Lannelongue Hospital, 92350 Le Plessis  
22 Robinson, France  
23

24 3. Complex congenital heart defects reference center - M3C-Necker, Paris Descartes  
25 University, Sorbonne Paris Cité, 75015 Paris, France  
26

27 4. Hôpital Trousseau, AP-HP, Centre pluridisciplinaire de diagnostic prénatal, UPMC, Paris,  
28 France  
29

30 5. Maternité de Port-Royal, Groupe Hospitalier Cochin-Broca-Hôtel Dieu, Université Paris  
31 Descartes, Assistance Publique-Hôpitaux de Paris, 53 av. de l'Observatoire, 75014 Paris,  
32 France  
33  
34

35  
36 Keywords: congenital heart defects, prenatal diagnosis, infant mortality, population-based  
37

38 Word counts:

39 Abstract: 245

40 Text: 2,287  
41

42 Running title: prenatal diagnosis and mortality of CHD  
43  
44  
45

46 Correspondence:

47 Babak Khoshnood, MD, PhD

48 INSERM U1153, Equipe EPOPé

49 Maternité Port Royal, 6<sup>ème</sup> étage

50 53 av. de l'Observatoire

51 75014 Paris

52 France

53 Email : babak.khoshnood@inserm.fr  
54  
55  
56  
57  
58  
59  
60

**Abstract**

Objectives: 1) Assess the population-level probability of prenatal diagnosis and termination of pregnancy for foetal anomaly for four major congenital heart defects; 2) Examine, using population-based data, the relation between timing of (pre- vs. post-natal) diagnosis and risk of infant (i.e., < 1-year) mortality for four major CHD. A secondary objective was

Design: Population-based cohort (the EPICARD) study

Setting: Greater Paris area (Paris and its surrounding suburbs)

Patients: 354 cases of four major CHD, including Functionally Univentricular Heart (FUH, N=132), d-Transposition of Great Arteries (d-TGA, N=85), Tetralogy of Fallot (TOF, N=60) and Coarctation of Aorta (CoA, N=77). Statistical analysis included the Mantel-Haenszel method and a test of homogeneity of risk ratios.

Results: Approximately 95% of FUH, more than two-thirds of d-TGA and TOF, and 40% of CoA were prenatally diagnosed. Overall, we did not find any statistically significant association between timing of (pre vs. post-natal) diagnosis of CHD and risk of infant mortality (Mantel-Haenszel Risk Ratio 1.1, 95% CI, 0.5 – 2.7); and the differences between the risk ratios of the association between prenatal diagnosis and infant mortality across the four CHD was not statistically significant.

Conclusion: These results imply that at least in the settings where specialized services are readily available, survival may no longer be the most relevant outcome, or the best criterion, for evaluating the impact of prenatal diagnosis on the outcome of CHD. The beneficial effects of prenatal diagnosis may be better sought by looking at more “subtle” or long-term neuro-developmental outcomes.

1  
2  
3 Strengths and limitations of this study  
4  
5

6 *Strengths*  
7

- 8 • We used data from a large, population-based, prospective cohort study to look at the  
9 association between prenatal diagnosis and the risk of infant (< 1 year) mortality for  
10 newborns with four major CHD: Functionally Univentricular Heart, d-Transposition of  
11 Great Arteries, Tetralogy of Fallot and Coarctation of Aorta.  
12
- 13 • We looked at both specific effects that may be associated with the four CHD in our  
14 study, as well as, the overall effect. We included a test of homogeneity to assess  
15 whether there were significant differences in the relation between prenatal diagnosis  
16 and risk of infant mortality for the four CHD.  
17  
18  
19

20  
21 *Limitations*  
22

- 23 • We did not evaluate the effects of prenatal diagnosis on pathways of care or on outcomes  
24 other than mortality.  
25
- 26 • While data were from a large, population-based prospective cohort study, the number of  
27 cases for individual CHD may not have been adequate to detect relatively small changes  
28 associated with prenatal diagnosis for individual CHD.  
29
- 30 • The extent to which our results may be generalizable to other regions in France, in particular  
31 rural areas where availability of high quality, specialist services is less than those in Paris is  
32 difficult to know. The question of generalizability of our results to other countries in Europe  
33 or elsewhere is also an open one and requires further study.  
34  
35  
36  
37  
38  
39  
40  
41  
42  
43  
44  
45  
46  
47  
48  
49  
50  
51  
52  
53  
54  
55  
56  
57  
58  
59  
60

**EPICARD Study group**

**Principal Investigators:** François Goffinet, Babak Khoshnood

**Steering Committee:**

Damien Bonnet (Hôpital Necker Enfants Malades, AP-HP, Centre de référence M3C, Université Paris Descartes, Paris)

Drina Candilis (Université Paris-Diderot, Paris)

Anne-Lise Delezoide (Hôpital Robert Debré, AP-HP, Service de biologie du Développement, Université Paris-Diderot, Paris)

François Goffinet (Groupe Hospitalier Cochin-Hôtel Dieu, AP-HP, Maternité Port-Royal et INSERM U1153, Equipe EPOPé, Université Paris Descartes, Paris)

Lucile Houyel (Hôpital Marie Lannelongue, Service de chirurgie des cardiopathies congénitales, Le Plessis-Robinson)

Jean-Marie Jouannic (Hôpital Trousseau, AP-HP, Centre pluridisciplinaire de diagnostic prénatal, UPMC, Paris)

Babak Khoshnood (INSERM U1153, Equipe EPOPé, Paris)

Nathalie Lelong (INSERM U1153, Equipe EPOPé, Paris)

Suzel Magnier (Hôpital Robert Debré, AP-HP, Service de cardiologie, Paris)

Jean-François Magny (Hôpital Necker Enfants Malades, AP-HP, Service de néonatalogie, Paris)

Caroline Rambaud (Hôpital Raymond Poincaré, AP-HP, Service d'anatomie et cytologie pathologiques – Médecine légale, UVSQ, Garches)

Dominique Salomon (INSERM U1153, Equipe EPOPé, Paris)

Johanna Calderon (INSERM U1153, Equipe EPOPé, Paris)

**Project Coordination and Data Analysis Committee:**

François Goffinet, Babak Khoshnood, Nathalie Lelong, Thibaut Andrieu, Anne-Claire Thieulin, Véronique Vodovar

**Independent Data Monitoring Committee (URC Paris Centre et CIC Cochin Necker Mère Enfant) :**

Maggy Chausson, Anissa Brinis, Laure Faure, Maryline Delattre, Jean-Marc Treluyer (Groupe Hospitalier Cochin-Hôtel Dieu, AP-HP, Université Paris Descartes, Paris)

**External Scientific Committee:**

Gérard Bréart, Dominique Cabrol, Alain Sérraf, Daniel Sidi, Marcel Voyer

**Participating Centers:**

The Greater Paris Area (Paris and its surrounding suburbs) public (AP-HP) and private maternity units, Departments of Pediatric Cardiology and Pediatric Cardiac Surgery, pediatric cardiologists in private practice, Neonatal Intensive Care Units, Pediatric Intensive Care Units, Emergency Transfer Services (SMUR), Departments of Pathology, Sudden Death Centers, Departments of Family and Infant Protection (DFPE)

## Introduction

Congenital heart defects (CHD) are the most frequent group of congenital anomalies<sup>1</sup>. In addition to their relatively high prevalence (~ 1% of all births), CHD also represent an important group of anomalies in that they are in many cases treatable. Nevertheless, and despite considerable progress in medical and surgical management of CHD over the past three decades, CHD remain a major cause of mortality and morbidity of perinatal origin and the first cause of infant death by malformation<sup>1-4</sup>.

Prenatal diagnosis and optimal post-natal management can result in secondary prevention of mortality and morbidity and improved long-term outcomes of newborns with CHD<sup>5-9</sup>. Indeed, previous studies have found that prenatal diagnosis can improve the chances of survival for newborns with certain types of CHD; this has been particularly the case for the Transposition of Great Arteries (TGA) where studies in France as well as in the United States and the United Kingdom have found a higher survival for newborns with a prenatal diagnosis of their CHD. For other, very severe CHD, including hypoplastic left heart syndrome, the results have not been consistent<sup>6,10-15</sup>; whereas some studies have found a survival advantage associated with prenatal diagnosis others have not found this to be the case.

Limited population-based data are available on the CHD in general and on the association between prenatal diagnosis and mortality in particular<sup>6,14,16</sup>. Indeed, by far most of the existing literature is based on studies in specialized centres. This paucity of population-based data in turn complicates the interpretation of the existing literature as outcomes from specialized centres may not reflect those in the population of patients as a whole and be subject to transfer and/or survival bias. In addition, the mortality outcomes assessed are often limited to short-term, post-surgical mortality whereas longer term mortality such as the overall infant (up to one-year) mortality has been assessed much less frequently.

1  
2  
3 Using data from a large, prospective, population-based cohort (EPICARD) study, we assessed the  
4  
5 probability of prenatal diagnosis and the impact of prenatal diagnosis on the risk of infant (until one  
6  
7 year of age) mortality for newborns with four major CHD, the Tetralogy of Fallot (TOF), the  
8  
9 Coarctation of Aorta (CoA), the Transposition of Great Arteries (d-TGA) and Functionally  
10  
11 Univentricular Heart (FUH).  
12  
13  
14  
15  
16  
17  
18  
19  
20  
21  
22  
23  
24  
25  
26  
27  
28  
29  
30  
31  
32  
33  
34  
35  
36  
37  
38  
39  
40  
41  
42  
43  
44  
45  
46  
47  
48  
49  
50  
51  
52  
53  
54  
55  
56  
57  
58  
59  
60

For peer review only



## Materials and Methods

### *Data source*

We used data from the EPICARD (EPIdémieologie des CARDiopathies congénitales) study, which is a population-based, prospective cohort study with long-term follow-up of all children with a CHD born to women in the Greater Paris area (Paris and its surrounding suburbs). All cases (live births, TOPFA, foetal deaths) diagnosed in the prenatal period or up to one year of age in the birth cohorts between May 1<sup>st</sup> 2005 and April 30<sup>th</sup> 2008 born to women residing in Greater Paris were eligible for inclusion. Diagnoses were confirmed in specialized paediatric cardiology departments and for the majority of TOPFA and foetal deaths by a standardized pathology examination. When a pathology exam could not be done the diagnoses were confirmed by a paediatric cardiologist (LH) and a specialist in echocardiography (JMJ) in the EPICARD study group, using the results of prenatal echocardiography examination.

Multiple sources of data including all maternity units, paediatric cardiology and cardiac surgery centres, foetal and neonatal pathology departments, neonatal and paediatric intensive units, infant units and outpatient clinics in Greater Paris and a neighbouring tertiary care centre were regularly consulted to attain completeness of case registrations. Informed consent was obtained from study participants and the study was approved by an ethics committee (French National Committee of Information and Liberty). The last cases included in the study were those in the 2008 birth cohort who were diagnosed in 2009. Follow-up of children in the EPICARD cohort is now completed and included assessment of children's health and neuro-developmental outcomes until eight years of age.

Details of coding and classification of cases for the EPICARD study are given elsewhere<sup>17</sup>. Briefly, two paediatric cardiologists in the EPICARD study group (LH, DB) attributed by consensus to each case,

1  
2  
3 one, or in less than 20% of cases, two or up to six, six-digit code(s) of the Long List of the  
4 International Paediatric and Congenital Cardiac Code (IPCCC)<sup>18</sup>.

5  
6  
7 When two or more of the four specific CHD were present for the same foetus, we used the following  
8 hierarchical decision rule to classify the foetus as one and only one of the four CHD in the study. The  
9 hierarchical order was as follows: FUH, TGA, TOF and CoA. Hence, foetuses in the study population  
10 with a FUH were classified as FUH regardless of any other associated anomalies. Those with TGA  
11 were classified as TGA except when FUH was also present. Those with TOF were classified as such (no  
12 other of the specific CHD were present). Finally, foetuses with CoA were classified as such when none  
13 of the other three CHD was also present.  
14  
15  
16  
17  
18  
19  
20  
21  
22  
23  
24  
25  
26

### 27 *Study population*

28 After excluding cases associated with chromosomal or other anomalies, our study population  
29 comprised 354 cases (live births, foetal deaths and TOPFA), including 60 cases of TOF, 77 CoA, 85 TGV  
30 and 132 FUH.  
31  
32  
33  
34  
35  
36  
37

### 38 *Statistical analysis*

39 For each of the four CHD, we calculated the proportion of cases with a prenatal diagnosis,  
40 terminations of pregnancy for foetal anomaly (TOPFA) and infant mortality with 95% binomial exact  
41 confidence intervals. We conducted a Mantel-Haenszel analysis to test the association between  
42 prenatal diagnosis and probability of mortality and tested whether the association of prenatal  
43 diagnosis with mortality varied across the four CHD by the test of homogeneity of risk ratios.  
44  
45  
46  
47  
48  
49  
50  
51

### 52 **Results**

53 Table 1 shows the probability of prenatal diagnosis and TOFA for the four CHD. Approximately, 95%  
54 of FUH (95% CI, 89.4 – 97.8), 71% of TGA (95% CI, 59.7 – 80.0), 68% of TOF (95% CI, 55.0 – 79.7) and  
55  
56  
57  
58  
59  
60

1  
2  
3 43% of CoA (95% CI, 31.6 – 54.6) were prenatally diagnosed (Table 1). *Among the prenatally*  
4  
5 *diagnosed cases* of FUH, about 70% (95% CI, 61.6 – 78.2) had a termination of pregnancy for foetal  
6  
7 anomaly (TOPFA); this proportion was approximately 3% for TGA, 12% for TOF and 9% for CoA (Table  
8  
9 1).

10  
11 Table 2 shows the outcomes of pregnancy for the four specific CHD *among all foetuses*. Live births  
12  
13 accounted for more than 90% of TGA, TOF and CoA, whereas less than one-third of FUH were born  
14  
15 alive. TOPFA comprised 67% of all foetuses with FUH, 2% of foetuses with TGA, 8% of those with TOF  
16  
17 and 4% of cases with FUH. Stillbirths accounted for about 4% of FUH and 2% of TGA, TOF and CoA.

18  
19 Table 3 shows the relation between infant mortality and prenatal diagnosis for the four CHD. Overall,  
20  
21 we found no statistical evidence of a lower risk of mortality for cases that were prenatally diagnosed  
22  
23 (Mantel-Haenszel combined Risk Ratio 1.1, 95% CI 0.5 – 2.2). The risk ratios of an infant death for  
24  
25 prenatally diagnosed vs. postnatally diagnosed cases were: 1.2 (95% CI, 0.5 – 3.1) for FUH, 2.1 (95%  
26  
27 CI, 0.3 – 17.1) for TGA, 0.3 (0.02 – 2.6) for TOF and 1.0 (95% CI, 0.2 – 5.7) for CoA. We found no  
28  
29 statistically significant differences in the association between the risk of mortality and prenatal  
30  
31 diagnosis across the four CHD (Test of homogeneity of risk ratios,  $p = 0.6$ ).  
32  
33  
34  
35  
36  
37  
38  
39  
40  
41  
42  
43  
44  
45  
46  
47  
48  
49  
50  
51  
52  
53  
54  
55  
56  
57  
58  
59  
60

## Discussion

Using prospective, population-based cohort data on 354 newborns with CHD, including Functionally Univentricular Heart, Transposition of Great Arteries, Tetralogy of Fallot and Coarctation of the aorta, we found that a considerable proportion of all cases were prenatally diagnosed. FUH, which can be diagnosed with the routine four-chamber view, had the highest probability of prenatal diagnosis (~95%) whereas those that need visualization of the arterial trunks had a lower probability of prenatal diagnosis, particularly in the case of CoA (~ 50%) whereas for TGA and TOF more than two-thirds of the cases had a prenatal diagnosis.

Looking at the association between timing of (pre- vs post-natal) diagnosis of CHD and risk of infant mortality, we did not find a statistically significant survival advantage associated with prenatal diagnosis for the four CHD examined. This finding suggests that in the current era, the beneficial effects of prenatal diagnosis in optimizing pre- and post-natal care of the newborns may be manifested, and hence should be looked for, in more “subtle” or long-term outcomes, particularly those related to specific neuro-developmental outcomes of the newborns with CHD<sup>19,20</sup>.

Our study has certain limits. Despite the large size of our population-based cohort, the number of deaths for TGA, TOF and CoA was relatively small reflecting the high survival rates of newborns with these three CHD. Therefore, the confidence intervals for our risk ratio estimates for the relation between prenatal diagnosis and risk of mortality for each CHD were relatively wide and hence we may have missed an effect associated with prenatal diagnosis due to limited precision of estimates. This may have been particularly the case for TOF where the point estimate for the risk ratio suggested a lower risk of mortality for cases that were prenatally diagnosed but that this difference was not statistically significant. For the other three CHD, the corresponding risk ratios were close to (or higher than) the null value. This suggests in turn that at least for FUH, TGA and CoA, the lack of a statistically significant association between the timing of diagnosis and risk of mortality in our data may in fact reflect the absence of relation between prenatal diagnosis and mortality. This may be due to the fact that with the improvements in post-natal care, the risk of mortality is nowadays low for

10

1  
2  
3 these “curable” CHD (TOF, TGA, and CoA) regardless of the timing of diagnosis. In the case of FUH,  
4  
5 there remains a high risk of infant mortality whether or not the cases were prenatally diagnosed.  
6

7  
8 Our study was based on population-based data from the Greater Paris area. In our region, the  
9  
10 organization of prenatal diagnostic services is well-codified and includes in particular the constitution  
11  
12 of 48 Multi-disciplinary Centres for Prenatal Diagnosis across the country, including four in Paris and  
13  
14 five in its surrounding suburbs. By law, the severity of the foetal anomaly must be certified by two  
15  
16 experts from these centres in order for the TOPFA to be authorized. For cases in which either TOPFA  
17  
18 is not an appropriate decision (“curable” or not sufficiently severe anomalies) or for which women  
19  
20 opt to continue their pregnancy even if the experts consider that TOPFA is an acceptable option, the  
21  
22 centres play an important role in the perinatal management of cases to optimize care for both  
23  
24 mothers and their affected newborns. Mandates for the exclusive coordination of prenatal diagnosis  
25  
26 services by these multi-disciplinary centres are likely to have contributed to a wider availability of  
27  
28 high-quality prenatal diagnostic services in our population. Moreover, there is a high concentration  
29  
30 of specialized services for postnatal care of newborns with CHD, including NICUs, PICUs and cardiac  
31  
32 surgery centres.  
33

34  
35 Hence, the extent to which our results may be generalizable to other regions in France, in particular  
36  
37 rural areas where availability of high quality, specialist services is less than those in Paris is difficult to  
38  
39 know. The question of generalizability of our results to other countries in Europe or elsewhere is also  
40  
41 an open one and requires further study.  
42

43  
44 We should emphasize that interpreting these results as proof for a general lack of efficacy of prenatal  
45  
46 diagnosis for optimal management and outcomes of CHD would clearly be misguided and misleading.  
47  
48 Instead, our results imply that survival may no longer be the most relevant outcome, or the best  
49  
50 criterion, for evaluating the impact of prenatal diagnosis on outcomes of CHD. Indeed, as recent  
51  
52 studies have shown, prenatal diagnosis can improve the neuro-developmental outcomes of  
53  
54 newborns with CHD, for example in case of the TGA<sup>19-22</sup>. What is needed now is to assess whether  
55  
56  
57  
58  
59  
60

1  
2  
3 these results that are based on hospital-based studies from specialized centres also hold at the  
4  
5 population-level and for other CHD. It would also be worthwhile to see whether prenatal diagnosis  
6  
7 may continue to be associated with better survival outcomes in settings where specialized services  
8  
9 are not readily available and require in-utero or early transfer of newborns to distant referral  
10  
11 centres. Moreover, the underlying clinical and pathophysiological mechanisms that may explain the  
12  
13 beneficial effects of prenatal diagnosis on outcomes of newborns with CHD require further study<sup>23</sup>.  
14  
15  
16  
17  
18  
19  
20  
21  
22

#### Reference List

- 23  
24  
25  
26 (1) Dolk H, Loane M, Garne E. Congenital Heart Defects in Europe: Prevalence and Perinatal  
27 Mortality, 2000 to 2005. *Circulation* 2011;123:841-849.  
28  
29 (2) Lee K, Khoshnood B, Chen L, Wall SN, Cromie WJ, Mittendorf RL. Infant mortality from  
30 congenital malformations in the United States, 1970-1997. *Obstet Gynecol* 2001;98:620-627.  
31  
32 (3) EUROCAT Central Registry UoU. EUROCAT Special Report: Congenital Heart Defects in  
33 Europe, 2000 - 2005. 2009. <http://www.eurocat-network.eu/content/Special-Report-CHD.pdf>  
34  
35 (4) Khoshnood B, Lelong N, Houyel L et al. Prevalence, timing of diagnosis and mortality of  
36 newborns with congenital heart defects: a population-based study. *Heart* 2012;98:1667-  
37 1673.  
38  
39 (5) Bonnet D, Coltri A, Butera G et al. Detection of transposition of the great arteries in fetuses  
40 reduces neonatal morbidity and mortality. *Circulation* 1999;99:916-918.  
41  
42 (6) Khoshnood B, De VC, Vodovar V et al. Trends in prenatal diagnosis, pregnancy termination,  
43 and perinatal mortality of newborns with congenital heart disease in France, 1983-2000: a  
44 population-based evaluation. *Pediatrics* 2005;115:95-101.  
45  
46 (7) Wernovsky G, Shillingford AJ, Gaynor JW. Central nervous system outcomes in children with  
47 complex congenital heart disease. *Curr Opin Cardiol* 2005;20:94-99.  
48  
49 (8) Blyth M, Howe D, Gnanapragasam J, Wellesley D. The hidden mortality of transposition of  
50 the great arteries and survival advantage provided by prenatal diagnosis. *BJOG*  
51 2008;115:1096-1100.  
52  
53  
54  
55  
56  
57  
58  
59  
60

- 1  
2  
3 (9) Calderon J, Angeard N, Moutier S, Plumet MH, Jambaque I, Bonnet D. Impact of prenatal  
4 diagnosis on neurocognitive outcomes in children with transposition of the great arteries. *J*  
5 *Pediatr* 2012;161:94-98.  
6  
7 (10) Holland BJ, Myers JA, Woods CR, Jr. Prenatal diagnosis of critical congenital heart disease  
8 reduces risk of death from cardiovascular compromise prior to planned neonatal cardiac  
9 surgery: a meta-analysis. *Ultrasound Obstet Gynecol* 2015;45:631-638.  
10  
11 (11) Kumar RK, Newburger JW, Gauvreau K, Kamenir SA, Hornberger LK. Comparison of outcome  
12 when hypoplastic left heart syndrome and transposition of the great arteries are diagnosed  
13 prenatally versus when diagnosis of these two conditions is made only postnatally. *Am J*  
14 *Cardiol* 1999;83:1649-1653.  
15  
16 (12) Mahle WT, Clancy RR, McGaurn SP, Goin JE, Clark BJ. Impact of prenatal diagnosis on survival  
17 and early neurologic morbidity in neonates with the hypoplastic left heart syndrome.  
18 *Pediatrics* 2001;107:1277-1282.  
19  
20 (13) Tworetzky W, McElhinney DB, Reddy VM, Brook MM, Hanley FL, Silverman NH. Improved  
21 surgical outcome after fetal diagnosis of hypoplastic left heart syndrome. *Circulation*  
22 2001;103:1269-1273.  
23  
24 (14) Oster ME, Kim CH, Kusano AS et al. A population-based study of the association of prenatal  
25 diagnosis with survival rate for infants with congenital heart defects. *Am J Cardiol*  
26 2014;113:1036-1040.  
27  
28 (15) Li YF, Zhou KY, Fang J, Wang C, Hua YM, Mu DZ. Efficacy of prenatal diagnosis of major  
29 congenital heart disease on perinatal management and perioperative mortality: a meta-  
30 analysis. *World J Pediatr* 2016;12:298-307.  
31  
32 (16) Wright LK, Ehrlich A, Stauffer N, Samai C, Kogon B, Oster ME. Relation of prenatal diagnosis  
33 with one-year survival rate for infants with congenital heart disease. *Am J Cardiol*  
34 2014;113:1041-1044.  
35  
36 (17) Houyel L, Khoshnood B, Anderson RH et al. Population-based evaluation of a suggested  
37 anatomic and clinical classification of congenital heart defects based on the International  
38 Paediatric and Congenital Cardiac Code. *Orphanet J Rare Dis* 2011;6:64.  
39  
40 (18) Franklin RC, Jacobs JP, Krogmann ON et al. Nomenclature for congenital and paediatric  
41 cardiac disease: historical perspectives and The International Pediatric and Congenital  
42 Cardiac Code. *Cardiol Young* 2008;18 Suppl 2:70-80.  
43  
44 (19) Calderon J, Bonnet D, Courtin C, Concordet S, Plumet MH, Angeard N. Executive function and  
45 theory of mind in school-aged children after neonatal corrective cardiac surgery for  
46 transposition of the great arteries. *Dev Med Child Neurol* 2010;52:1139-1144.  
47  
48 (20) Calderon J, Angeard N, Moutier S, Plumet MH, Jambaque I, Bonnet D. Impact of prenatal  
49 diagnosis on neurocognitive outcomes in children with transposition of the great arteries. *J*  
50 *Pediatr* 2012;161:94-98.  
51  
52 (21) Calderon J, Jambaque I, Bonnet D, Angeard N. Executive functions development in 5- to 7-  
53 year-old children with transposition of the great arteries: a longitudinal study. *Dev*  
54 *Neuropsychol* 2014;39:365-384.  
55  
56  
57  
58  
59  
60

- 1  
2  
3 (22) Calderon J, Angeard N, Pinabiaux C, Bonnet D, Jambaque I. Facial expression recognition and  
4 emotion understanding in children after neonatal open-heart surgery for transposition of the  
5 great arteries. *Dev Med Child Neurol* 2014;56:564-571.  
6  
7 (23) Peyvandi S, De S, V, Chakkarapani E et al. Association of Prenatal Diagnosis of Critical  
8 Congenital Heart Disease With Postnatal Brain Development and the Risk of Brain Injury.  
9 *JAMA Pediatr* 2016;170:e154450.  
10  
11  
12  
13  
14  
15  
16  
17  
18  
19  
20  
21  
22  
23  
24  
25  
26  
27  
28  
29  
30  
31  
32  
33  
34  
35  
36  
37  
38  
39  
40  
41  
42  
43  
44  
45  
46  
47  
48  
49  
50  
51  
52  
53  
54  
55  
56  
57  
58  
59  
60

For peer review only



1  
2  
3  
4 Exclusive license: The Corresponding Author has the right to grant on behalf of all authors  
5 and does grant on behalf of all authors, an exclusive licence on a worldwide basis to the BMJ  
6 Publishing Group Ltd to permit this article (if accepted) to be published in BMJ editions and  
7 any other BMJ PGL products and sublicenses such use and exploit all subsidiary rights, as set  
8 out in our licence.  
9

#### 10 11 12 **Acknowledgements and Disclosure section**

13  
14 B Khoshnood and N Lelong had full access to the data and take responsibility for the integrity of the  
15 data and the accuracy of the data analysis.  
16

17  
18 The EPICARD study was approved by the French National Committee of Information and Freedom (*Commission*  
19 *nationale de l'informatique et des libertés*).  
20

21 **Funding:** This work was supported by two grants from the French Ministry of Health (PHRC 2004 and 2008).  
22 Additional funding was provided by the AREMCAR (Association pour la Recherche et l'Etude des Maladies  
23 Cardiovasculaires) association.  
24

25 The funding sources had no role in the study design, data collection, data interpretation, or the writing of the  
26 manuscript.  
27

28 **Data sharing statement:** No additional data available.  
29  
30  
31

#### 32 **Conflicts of interest:**

33  
34 The authors have no conflicts of interest to declare. The funding sources had no role in the study  
35 design, data collection, data interpretation, or the writing of the manuscript.  
36  
37  
38

#### 39 **Contributors:**

40  
41 B. Khoshnood and F. Goffinet conceived the study. N. Lelong and B. Khoshnood with help from  
42 Morgane Ballon conducted the statistical analysis with the assistance of Morgane Ballon and in  
43 consultation with F. Goffinet. L. Houyel, D. Bonnet and JM Jouannic provided clinical expertise. B.  
44 Khoshnood wrote the first draft of the article. All co-authors made substantial contributions to the  
45 interpretation of results and revisions of the manuscript.  
46  
47

#### 48 **Funding:**

49  
50 This work was supported by two grants from the French Ministry of Health (PHRC 2004 and 2008).  
51 Additional funding was provided by the AREMCAR Association.  
52  
53  
54  
55  
56  
57  
58  
59  
60

Table 1 : Prenatal diagnosis for four specific CHD, EPICARD population-based cohort study

| Congenital Heart Defect                              | Prenatal Diagnosis <sup>(1)</sup> |      |           | % TOPFA <sup>(2)</sup> |           |
|------------------------------------------------------|-----------------------------------|------|-----------|------------------------|-----------|
|                                                      | N                                 | %    | 95% CI    | %                      | 95% CI    |
| Functionally Univentricular Heart <sup>(1)</sup>     | 132                               | 94.7 | 89.4-97.8 | 70.4                   | 61.6-78.2 |
| d-Transposition of the great arteries <sup>(1)</sup> | 85                                | 70.6 | 59.7-80.0 | 3.3                    | 0.4-11.5  |
| Tetralogy of Fallot <sup>(1)</sup>                   | 60                                | 68.3 | 55.0-79.7 | 12.2                   | 4.1-26.2  |
| Coarctation of the aorta <sup>(1)</sup>              | 77                                | 42.9 | 31.6-54.6 | 9.1                    | 1.9-24.3  |

(1) Cases with the specific IPCCC code for the given CHD, whether or not other CHD codes were also included; all cases with chromosomal or others anomalies were excluded

(2) Terminations of Pregnancy for Fetal Anomaly (TOPFA) among prenatally diagnoses cases

Table 2 : Pregnancy outcomes for four specific CHD, EPICARD population-based cohort study

| Congenital Heart Defect                              | Live births |      |           | TOPFA <sup>(2)</sup> |           | Stillbirths |          |
|------------------------------------------------------|-------------|------|-----------|----------------------|-----------|-------------|----------|
|                                                      | N           | %    | 95% CI    | %                    | 95% CI    | %           | 95% CI   |
| Functionally univentricular heart <sup>(1)</sup>     | 132         | 29.5 | 21.9-38.1 | 66.7                 | 57.9-74.6 | 3.8         | 1.2-8.6  |
| d-Transposition of the great arteries <sup>(1)</sup> | 85          | 95.2 | 88.4-98.7 | 2.4                  | 0.3-8.2   | 2.4         | 0.3-8.2  |
| Tetralogy of Fallot <sup>(1)</sup>                   | 60          | 90.0 | 79.5-96.2 | 8.3                  | 2.8-18.4  | 1.7         | 0.04-8.9 |
| Coarctation of the aorta <sup>(1)</sup>              | 77          | 94.8 | 87.2-98.6 | 3.9                  | 0.8-11.0  | 1.3         | 0.03-7.0 |

(1) Cases with the specific IPCCC code for the given CHD, whether or not other CHD codes were also included; all cases with chromosomal or others anomalies were excluded

(2) Terminations of Pregnancy for Fetal Anomaly (TOPFA) among the overall number of cases (i.e number of TOPFA divided by the total number of cases)

Table 3 : Association between prenatal diagnosis and risk of infant mortality for four specific CHD, EPICARD population-based cohort study

| Congenital Heart Defect                              | Prenatal Diagnosis |    | Infant mortality |            |        |            |
|------------------------------------------------------|--------------------|----|------------------|------------|--------|------------|
|                                                      | N                  | %  | 95% CI           | Risk Ratio | 95% CI |            |
| Functionally univentricular heart <sup>(1)</sup>     | No                 | 7  | 42.9             | 9.9-81.6   |        |            |
|                                                      | Yes                | 32 | 53.1             | 34.7-70.9  | 1.2    | 0.5 - 3.1  |
| d-Transposition of the great arteries <sup>(1)</sup> | No                 | 24 | 4.2              | 0.1-21.1   |        |            |
|                                                      | Yes                | 57 | 8.8              | 2.9-19.3   | 2.1    | 0.3 - 17.1 |
| Tetralogy of Fallot <sup>(1)</sup>                   | No                 | 18 | 11.1             | 1.4-34.7   |        |            |
|                                                      | Yes                | 36 | 2.8              | 0.07-14.5  | 0.3    | 0.02-2.6   |
| Coarctation of the aorta <sup>(1)</sup>              | No                 | 44 | 6.8              | 1.4-18.7   |        |            |
|                                                      | Yes                | 29 | 6.9              | 0.8-22.8   | 1.0    | 0.2-5.7    |

(1) Cases with the specific IPCCC code for the given CHD, whether or not other CHD codes were also included; all cases with chromosomal or others anomalies were excluded

# BMJ Open

## Impact of prenatal diagnosis on survival of newborns with four congenital heart defects: A prospective, population-based cohort study in France (the EPICARD Study)

|                                 |                                                                                                                                                                                                                                                                                                                                                                                                                                                                                                                                                                                                                                                                                                                                                                                                                                                                                                                                                                                                                                                                                                                                                                                                                                                                                                                                               |
|---------------------------------|-----------------------------------------------------------------------------------------------------------------------------------------------------------------------------------------------------------------------------------------------------------------------------------------------------------------------------------------------------------------------------------------------------------------------------------------------------------------------------------------------------------------------------------------------------------------------------------------------------------------------------------------------------------------------------------------------------------------------------------------------------------------------------------------------------------------------------------------------------------------------------------------------------------------------------------------------------------------------------------------------------------------------------------------------------------------------------------------------------------------------------------------------------------------------------------------------------------------------------------------------------------------------------------------------------------------------------------------------|
| Journal:                        | <i>BMJ Open</i>                                                                                                                                                                                                                                                                                                                                                                                                                                                                                                                                                                                                                                                                                                                                                                                                                                                                                                                                                                                                                                                                                                                                                                                                                                                                                                                               |
| Manuscript ID                   | bmjopen-2017-018285.R1                                                                                                                                                                                                                                                                                                                                                                                                                                                                                                                                                                                                                                                                                                                                                                                                                                                                                                                                                                                                                                                                                                                                                                                                                                                                                                                        |
| Article Type:                   | Research                                                                                                                                                                                                                                                                                                                                                                                                                                                                                                                                                                                                                                                                                                                                                                                                                                                                                                                                                                                                                                                                                                                                                                                                                                                                                                                                      |
| Date Submitted by the Author:   | 08-Sep-2017                                                                                                                                                                                                                                                                                                                                                                                                                                                                                                                                                                                                                                                                                                                                                                                                                                                                                                                                                                                                                                                                                                                                                                                                                                                                                                                                   |
| Complete List of Authors:       | <p>Khoshnood, Babak; INSERM UMR 1153, Obstetrical, Perinatal and Pediatric Epidemiology Research Team (EPOPé), Center for Epidemiology and Statistics, Sorbonne Paris Cité (CRESS), DHU Risks in Pregnancy, Paris Descartes University, Paris, France</p> <p>Lelong, Nathalie; INSERM UMR 1153, Obstetrical, Perinatal and Pediatric Epidemiology Research Team (EPOPé), Center for Epidemiology and Statistics, Sorbonne Paris Cité (CRESS), DHU Risks in Pregnancy, Paris Descartes University, Paris, France</p> <p>Houyel, Lucile; Service de chirurgie des cardiopathies congénitales, Hôpital Marie Lannelongue,</p> <p>Bonnet, Damien; Centre de référence M3C-Necker, Université Paris Descartes, 140 rue de Sèvres, 75015 Paris, France,</p> <p>Ballon, Morgane; INSERM UMR 1153, Obstetrical, Perinatal and Pediatric Epidemiology Research Team (EPOPé), Center for Epidemiology and Statistics, Sorbonne Paris Cité (CRESS), DHU Risks in Pregnancy, Paris Descartes University, Paris, France</p> <p>Jouannic, Jean-Marie; Hôpital Trousseau, AP-HP, Centre pluridisciplinaire de diagnostic prénatal, UPMC</p> <p>Goffinet, François; Maternité de Port-Royal, Groupe Hospitalier Cochin-Broca-Hôtel Dieu, Université Paris Descartes, Assistance Publique-Hôpitaux de Paris, 53 av. de l'Observatoire, 75014 Paris, France</p> |
| <b>Primary Subject Heading</b>: | Cardiovascular medicine                                                                                                                                                                                                                                                                                                                                                                                                                                                                                                                                                                                                                                                                                                                                                                                                                                                                                                                                                                                                                                                                                                                                                                                                                                                                                                                       |
| Secondary Subject Heading:      | Epidemiology                                                                                                                                                                                                                                                                                                                                                                                                                                                                                                                                                                                                                                                                                                                                                                                                                                                                                                                                                                                                                                                                                                                                                                                                                                                                                                                                  |
| Keywords:                       | Congenital heart disease < CARDIOLOGY, EPIDEMIOLOGY, Prenatal diagnosis < OBSTETRICS                                                                                                                                                                                                                                                                                                                                                                                                                                                                                                                                                                                                                                                                                                                                                                                                                                                                                                                                                                                                                                                                                                                                                                                                                                                          |
|                                 |                                                                                                                                                                                                                                                                                                                                                                                                                                                                                                                                                                                                                                                                                                                                                                                                                                                                                                                                                                                                                                                                                                                                                                                                                                                                                                                                               |

SCHOLARONE™  
Manuscripts

1  
2  
3  
4  
5  
6 Impact of prenatal diagnosis on survival of newborns with four congenital heart defects: A  
7 prospective, population-based cohort study in France (the EPICARD Study)  
8  
9

10  
11  
12 Babak Khoshnood<sup>1</sup>, Nathalie Lelong<sup>1</sup>, Lucile Houyel<sup>2</sup>, Damien Bonnet<sup>3</sup>, Morgane Ballon<sup>1</sup>,  
13 Jean-Marie Jouannic<sup>4</sup> and François Goffinet<sup>1,5</sup> on behalf of the EPICARD Study Group  
14  
15

16  
17 1. INSERM UMR 1153, Obstetrical, Perinatal and Pediatric Epidemiology Research Team  
18 (EPOPé), Center for Epidemiology and Statistics, Sorbonne Paris Cité (CRESS), DHU Risks in  
19 Pregnancy, Paris Descartes University, Paris, France  
20

21 2. Congenital heart defects surgery unit, Marie Lannelongue Hospital, 92350 Le Plessis  
22 Robinson, France  
23

24 3. Complex congenital heart defects reference center - M3C-Necker, Paris Descartes  
25 University, Sorbonne Paris Cité, 75015 Paris, France  
26

27 4. Hôpital Trousseau, AP-HP, Centre pluridisciplinaire de diagnostic prénatal, UPMC, Paris,  
28 France  
29

30 5. Maternité de Port-Royal, Groupe Hospitalier Cochin-Broca-Hôtel Dieu, Université Paris  
31 Descartes, Assistance Publique-Hôpitaux de Paris, 53 av. de l'Observatoire, 75014 Paris,  
32 France  
33  
34

35  
36 Keywords: congenital heart defects, prenatal diagnosis, infant mortality, population-based  
37

38 Word counts:

39 Abstract: 241

40 Text: 2,684

41  
42 Running title: prenatal diagnosis and mortality of CHD  
43  
44

45  
46 Correspondence:

47 Babak Khoshnood, MD, PhD

48 INSERM U1153, Equipe EPOPé

49 Maternité Port Royal, 6<sup>ème</sup> étage

50 53 av. de l'Observatoire

51 75014 Paris

52 France

53 Email : babak.khoshnood@inserm.fr  
54  
55  
56  
57  
58  
59  
60

**Abstract**

Objectives: 1) Assess the population-level probability of prenatal diagnosis and termination of pregnancy for foetal anomaly for four major congenital heart defects; 2) Examine, using population-based data, the relation between timing of (pre- vs. post-natal) diagnosis and risk of infant (i.e., < 1-year) mortality for four major CHD.

Design: Population-based cohort (the EPICARD) study

Setting: Greater Paris area (Paris and its surrounding suburbs)

Patients: 354 cases of four major CHD, including Functionally Univentricular Heart (FUH, N=132), d-Transposition of Great Arteries (d-TGA, N=85), Tetralogy of Fallot (TOF, N=60) and Coarctation of Aorta (CoA, N=77). Statistical analysis included the Mantel-Haenszel method and a test of homogeneity of risk ratios.

Results: Approximately 95% of FUH, more than two-thirds of d-TGA and TOF, and 40% of CoA were prenatally diagnosed. Overall, we did not find any statistically significant association between timing of (pre vs. post-natal) diagnosis of CHD and risk of infant mortality (Mantel-Haenszel Risk Ratio 1.1, 95% CI, 0.5 – 2.7); and the differences between the risk ratios of the association between prenatal diagnosis and infant mortality across the four CHD was not statistically significant.

Conclusion: These results imply that at least in the settings where specialized services are readily available, survival may no longer be the most relevant outcome, or the best criterion, for evaluating the impact of prenatal diagnosis on the outcome of CHD. The beneficial effects of prenatal diagnosis may be better sought by looking at more “subtle” or long-term neuro-developmental outcomes.

1  
2  
3 Strengths and limitations of this study  
4  
5

6 *Strengths*  
7

- 8
- 9 • We used data from a large, population-based, prospective cohort study to look at the  
10 association between prenatal diagnosis and the risk of infant (< 1 year) mortality for  
11 newborns with four major CHD: Functionally Univentricular Heart, d-Transposition of  
12 Great Arteries, Tetralogy of Fallot and Coarctation of Aorta.  
13
  - 14 • We looked at both specific effects that may be associated with the four CHD in our  
15 study, as well as, the overall effect. We included a test of homogeneity to assess  
16 whether there were significant differences in the relation between prenatal diagnosis  
17 and risk of infant mortality for the four CHD.  
18  
19

20  
21 *Limitations*  
22

- 23
- 24 • We did not evaluate the effects of prenatal diagnosis on pathways of care or on outcomes  
25 other than mortality.  
26
  - 27 • While data were from a large, population-based prospective cohort study, the number of  
28 cases for individual CHD may not have been adequate to detect relatively small changes  
29 associated with prenatal diagnosis for individual CHD.  
30
  - 31 • The extent to which our results may be generalizable to other regions in France, in particular  
32 rural areas where availability of high quality, specialist services is less than those in Paris is  
33 difficult to know. The question of generalizability of our results to other countries in Europe  
34 or elsewhere is also an open one and requires further study.  
35  
36  
37  
38  
39  
40  
41  
42  
43  
44  
45  
46  
47  
48  
49  
50  
51  
52  
53  
54  
55  
56  
57  
58  
59  
60



**EPICARD Study group****Principal Investigators:** François Goffinet, Babak Khoshnood**Steering Committee:**

Damien Bonnet (Hôpital Necker Enfants Malades, AP-HP, Centre de référence M3C, Université Paris Descartes, Paris)

Drina Candilis (Université Paris-Diderot, Paris)

Anne-Lise Delezoide (Hôpital Robert Debré, AP-HP, Service de biologie du Développement, Université Paris-Diderot, Paris)

François Goffinet (Groupe Hospitalier Cochin-Hôtel Dieu, AP-HP, Maternité Port-Royal et INSERM U1153, Equipe EPOPé, Université Paris Descartes, Paris)

Lucile Houyel (Hôpital Marie Lannelongue, Service de chirurgie des cardiopathies congénitales, Le Plessis-Robinson)

Jean-Marie Jouannic (Hôpital Trousseau, AP-HP, Centre pluridisciplinaire de diagnostic prénatal, UPMC, Paris)

Babak Khoshnood (INSERM U1153, Equipe EPOPé, Paris)

Nathalie Lelong (INSERM U1153, Equipe EPOPé, Paris)

Suzel Magnier (Hôpital Robert Debré, AP-HP, Service de cardiologie, Paris)

Jean-François Magny (Hôpital Necker Enfants Malades, AP-HP, Service de néonatalogie, Paris)

Caroline Rambaud (Hôpital Raymond Poincaré, AP-HP, Service d'anatomie et cytologie pathologiques – Médecine légale, UVSQ, Garches)

Dominique Salomon (INSERM U1153, Equipe EPOPé, Paris)

Johanna Calderon (INSERM U1153, Equipe EPOPé, Paris)

**Project Coordination and Data Analysis Committee:**

François Goffinet, Babak Khoshnood, Nathalie Lelong, Thibaut Andrieu, Anne-Claire Thieulin, Véronique Vodovar

**Independent Data Monitoring Committee (URC Paris Centre et CIC Cochin Necker Mère Enfant) :**

Maggy Chausson, Anissa Brinis, Laure Faure, Maryline Delattre, Jean-Marc Treluyer (Groupe Hospitalier Cochin-Hôtel Dieu, AP-HP, Université Paris Descartes, Paris)

**External Scientific Committee:**

Gérard Bréart, Dominique Cabrol, Alain Sérraf, Daniel Sidi, Marcel Voyer

**Participating Centers:**

The Greater Paris Area (Paris and its surrounding suburbs) public (AP-HP) and private maternity units, Departments of Pediatric Cardiology and Pediatric Cardiac Surgery, pediatric cardiologists in private practice, Neonatal Intensive Care Units, Pediatric Intensive Care Units, Emergency Transfer Services (SMUR), Departments of Pathology, Sudden Death Centers, Departments of Family and Infant Protection (DFPE)

## Introduction

Congenital heart defects (CHD) are the most frequent group of congenital anomalies<sup>1</sup>. In addition to their relatively high prevalence (~ 1% of all births), CHD also represent an important group of anomalies in that they are in many cases treatable. Nevertheless, and despite considerable progress in medical and surgical management of CHD over the past three decades, CHD remain a major cause of mortality and morbidity of perinatal origin and the first cause of infant death by malformation<sup>1-4</sup>.

Prenatal diagnosis and optimal post-natal management can result in secondary prevention of mortality and morbidity and improved long-term outcomes of newborns with CHD<sup>5-9</sup>. Indeed, previous studies have found that prenatal diagnosis can improve the chances of survival for newborns with certain types of CHD; this has been particularly the case for the Transposition of Great Arteries (TGA) where studies in France as well as in the United States and the United Kingdom have found a higher survival for newborns with a prenatal diagnosis of their CHD. For other, very severe CHD, including hypoplastic left heart syndrome, the results have not been consistent<sup>6,10-15</sup>; whereas some studies have found a survival advantage associated with prenatal diagnosis others have not found this to be the case.

Limited population-based data are available on the CHD in general and on the association between prenatal diagnosis and mortality in particular<sup>6,14,16</sup>. Indeed, by far most of the existing literature is based on studies in specialized centres. This paucity of population-based data in turn complicates the interpretation of the existing literature as outcomes from specialized centres may not reflect those in the population of patients as a whole and be subject to transfer and/or survival bias. In addition, the mortality outcomes assessed are often limited to short-term, post-surgical mortality whereas longer term mortality such as the overall infant (up to one-year) mortality has been assessed much less frequently.

1  
2  
3 Using data from a large, prospective, population-based cohort (EPICARD) study, we assessed the  
4  
5 probability of prenatal diagnosis and the impact of prenatal diagnosis on the risk of infant (until one  
6  
7 year of age) mortality for newborns with four major CHD, the Tetralogy of Fallot (TOF), the  
8  
9 Coarctation of Aorta (CoA), the Transposition of Great Arteries (d-TGA) and Functionally  
10  
11 Univentricular Heart (FUH).  
12  
13  
14  
15  
16  
17  
18  
19  
20  
21  
22  
23  
24  
25  
26  
27  
28  
29  
30  
31  
32  
33  
34  
35  
36  
37  
38  
39  
40  
41  
42  
43  
44  
45  
46  
47  
48  
49  
50  
51  
52  
53  
54  
55  
56  
57  
58  
59  
60

For peer review only

## Materials and Methods

### *Data source*

We used data from the EPICARD (EPIdémiologie des CARDiopathies congénitales) study, which is a population-based, prospective cohort study with long-term follow-up of all children with a CHD born to women in the Greater Paris area (Paris and its surrounding suburbs). All cases (live births, TOPFA, foetal deaths) diagnosed in the prenatal period or up to one year of age in the birth cohorts between May 1<sup>st</sup> 2005 and April 30<sup>th</sup> 2008 born to women residing in Greater Paris were eligible for inclusion. Diagnoses were confirmed in specialized paediatric cardiology departments and for the majority of TOPFA and foetal deaths by a standardized pathology examination. When a pathology exam could not be done the diagnoses were confirmed by a paediatric cardiologist (LH) and a specialist in echocardiography (JM) in the EPICARD study group, using the results of prenatal echocardiography examination.

Multiple sources of data including all maternity units, paediatric cardiology and cardiac surgery centres, foetal and neonatal pathology departments, neonatal and paediatric intensive units, infant units and outpatient clinics in Greater Paris and a neighbouring tertiary care centre were regularly consulted to attain completeness of case registrations. Informed consent was obtained from study participants and the study was approved by an ethics committee (French National Committee of Information and Liberty). The last cases included in the study were those in the 2008 birth cohort who were diagnosed in 2009. Follow-up of children in the EPICARD cohort is now completed and included assessment of children's health and neuro-developmental outcomes until eight years of age.

Details of coding and classification of cases for the EPICARD study are given elsewhere<sup>17</sup>. Briefly, two paediatric cardiologists in the EPICARD study group (LH, DB) attributed by consensus to each case,

1  
2  
3 one, or in less than 20% of cases, two or up to six, six-digit code(s) of the Long List of the  
4 International Paediatric and Congenital Cardiac Code (IPCCC)<sup>18</sup>.

5  
6  
7 In order to identify “isolated” cases of each of the four CHD, we first excluded all cases that were  
8 associated with chromosomal anomalies and/or anomalies of other systems, including syndromes  
9 (see Figure 1). In addition, when two or more of the four specific CHD were present for the same  
10 foetus, we used the following hierarchical decision rule to classify the foetus as one and only one of  
11 the four CHD in the study. The hierarchical order was as follows: FUH, TGA, TOF and CoA. Hence,  
12 foetuses in the study population with a FUH were classified as FUH regardless of any other associated  
13 anomalies. Those with TGA were classified as TGA except when FUH was also present. Those with  
14 TOF were classified as such (no other of the specific CHD were present). Finally, foetuses with CoA  
15 were classified as such when none of the other three CHD was also present.  
16  
17  
18  
19  
20  
21  
22  
23  
24  
25  
26  
27  
28  
29  
30

### 31 *Study population*

32  
33 Figure 1 shows the flow diagram for the selection of our study population. Overall, after excluding  
34 cases associated with chromosomal or other non-cardiac anomalies, including syndromes, our study  
35 population comprised 354 cases (live births, foetal deaths and TOPFA), including 60 cases of TOF, 77  
36 CoA, 85 TGV and 132 FUH.  
37  
38  
39  
40  
41  
42  
43

### 44 *Statistical analysis*

45  
46 For each of the four CHD, we calculated the proportion of cases with a prenatal diagnosis,  
47 terminations of pregnancy for foetal anomaly (TOPFA) and infant mortality with 95% binomial exact  
48 confidence intervals. We conducted a Mantel-Haenszel analysis to test the association between  
49 prenatal diagnosis and probability of mortality and tested whether the association of prenatal  
50 diagnosis with mortality varied across the four CHD by the test of homogeneity of risk ratios.  
51  
52  
53  
54  
55  
56  
57  
58  
59  
60

## Results

Table 1 shows the probability of prenatal diagnosis and TOFA for the four CHD. Approximately, 95% of FUH (95% CI, 89.4 – 97.8), 71% of TGA (95% CI, 59.7 – 80.0), 68% of TOF (95% CI, 55.0 – 79.7) and 43% of CoA (95% CI, 31.6 – 54.6) were prenatally diagnosed (Table 1). *Among the prenatally diagnosed cases* of FUH, about 70% (95% CI, 61.6 – 78.2) had a termination of pregnancy for foetal anomaly (TOPFA); this proportion was approximately 3% for TGA, 12% for TOF and 9% for CoA (Table 1).

Table 2 shows the outcomes of pregnancy for the four specific CHD *among all fetuses*. Live births accounted for more than 90% of TGA, TOF and CoA, whereas less than one-third of FUH were born alive. TOPFA comprised 67% of all fetuses with FUH, 2% of fetuses with TGA, 8% of those with TOF and 4% of cases with FUH. Stillbirths accounted for about 4% of FUH and 2% of TGA, TOF and CoA.

Table 3 shows the relation between infant mortality and prenatal diagnosis for the four CHD. Overall, we found no statistical evidence of a lower risk of mortality for cases that were prenatally diagnosed (Mantel-Haenszel combined Risk Ratio 1.1, 95% CI 0.5 – 2.2). The risk ratios of an infant death for prenatally diagnosed vs. postnatally diagnosed cases were: 1.2 (95% CI, 0.5 – 3.1) for FUH, 2.1 (95% CI, 0.3 – 17.1) for TGA, 0.3 (0.02 – 2.6) for TOF and 1.0 (95% CI, 0.2 – 5.7) for CoA. We found no statistically significant differences in the association between the risk of mortality and prenatal diagnosis across the four CHD (Test of homogeneity of risk ratios,  $p = 0.6$ ).

## Discussion

Using prospective, population-based cohort data on 354 newborns with CHD, including Functionally Univentricular Heart, Transposition of Great Arteries, Tetralogy of Fallot and Coarctation of the aorta, we found that a considerable proportion of all cases were prenatally diagnosed. FUH, which can be diagnosed with the routine four-chamber view, had the highest probability of prenatal diagnosis (~95%) whereas those that need visualization of the arterial trunks had a lower probability of

1  
2  
3 prenatal diagnosis, particularly in the case of CoA (~ 50%) whereas for TGA and TOF more than two-  
4  
5 thirds of the cases had a prenatal diagnosis.

6  
7 Looking at the association between timing of (pre- vs post-natal) diagnosis of CHD and risk of infant  
8  
9 mortality, we did not find a statistically significant survival advantage associated with prenatal  
10  
11 diagnosis for the four CHD examined. Notwithstanding the limitations of the study and the caveats  
12  
13 noted below, our findings suggest that in the current era, the beneficial effects of prenatal diagnosis  
14  
15 in optimizing pre- and post-natal care of the newborns may be manifested, and hence should be  
16  
17 looked for, in more “subtle” or long-term outcomes, particularly those related to specific neuro-  
18  
19 developmental outcomes of the newborns with CHD<sup>19;20</sup>.

20  
21 Our study has certain limits. Despite the large size of our population-based cohort, the number of  
22  
23 deaths for TGA, TOF and CoA was relatively small reflecting the high survival rates of newborns with  
24  
25 these three CHD. Therefore, the confidence intervals for our risk ratio estimates for the relation  
26  
27 between prenatal diagnosis and risk of mortality for each CHD were relatively wide and hence we  
28  
29 may have missed an effect associated with prenatal diagnosis due to limited precision of estimates.  
30  
31 This may have been particularly the case for TOF where the point estimate for the risk ratio  
32  
33 suggested a lower risk of mortality for cases that were prenatally diagnosed but that this difference  
34  
35 was not statistically significant. For the other three CHD, the corresponding risk ratios were close to  
36  
37 or higher than the null value. This suggests in turn that at least for FUH, TGA and CoA, the lack of a  
38  
39 statistically significant association between prenatal diagnosis and risk of mortality may reflect the  
40  
41 absence of relation between prenatal diagnosis and mortality. This may be due to the fact that with  
42  
43 the improvements in post-natal care, the risk of mortality is nowadays low for these “curable” CHD  
44  
45 (TOF, TGA, and CoA) regardless of the timing of diagnosis. In the case of FUH, there remains a high  
46  
47 risk of infant mortality whether or not the cases were prenatally diagnosed.

48  
49 However, in addition to a relatively small sample size for individual CHD which may have resulted in  
50  
51 lack of statistically significant results, an important caveat should be considered in interpreting our  
52  
53  
54  
55

1  
2  
3 results on the relation between prenatal diagnosis and risk of mortality. It is at least possible that  
4  
5 even in the case of an individual, well-characterised defect those that are prenatally diagnosed may  
6  
7 be more severe than those diagnosed later. Hence, finding a survival advantage in relation to  
8  
9 prenatal diagnosis, as has been found to be the case particularly for TGA in previous studies, may  
10  
11 represent the “lower limit” of the advantage that may be attributed to prenatal diagnosis, which can  
12  
13 lead to a more optimal post-natal clinical and surgical management of CHD. Along the same lines,  
14  
15 lack of a survival advantage, may be due to an adverse selection bias for cases diagnosed prenatally.  
16  
17 This “negative” finding can hence be misleading as the absence of an effect associated with prenatal  
18  
19 diagnosis, would actually indicate that prenatal diagnosis improves survival.  
20  
21

22 We also conducted an exploratory analysis (detailed results available from authors) to look at the  
23  
24 possible effects of cardiac anomalies that may have been associated with the four CHD in our study.  
25  
26 Specifically, we looked separately at each of the four CHD when they were completely isolated, i.e.,  
27  
28 when there were no cardiac anomalies present other than the four CHD themselves vs. when they  
29  
30 were associated with other cardiac defects (note that cases with non-cardiac defects, including  
31  
32 syndromes as well as chromosomal anomalies had already been excluded).  
33  
34

35 In general, when the defect was completely isolated the risk of mortality was lower than when the  
36  
37 defect was associated with other cardiac anomalies. However, the relation between prenatal  
38  
39 diagnosis and risk of mortality was not appreciably different for the completely isolated cases vs.  
40  
41 those associated with other cardiac anomalies. It should be noted that this stratified analysis can at  
42  
43 best be considered exploratory as the number of events (deaths) in each group were quite small.  
44  
45

46 Nevertheless, the results of this analysis make clinical sense. Even though we did not look specifically  
47  
48 at post-operative mortality, associated cardiac anomalies can in particular render the surgical  
49  
50 interventions more complex, which can in turn explain at least some of the higher risk of mortality in  
51  
52 the group of defects associated with other cardiac anomalies.  
53  
54  
55  
56  
57  
58  
59  
60



1  
2  
3 Our findings reflect population-based data from the Greater Paris area. In our region, the  
4 organization of prenatal diagnostic services is well-codified and includes in particular the constitution  
5 of 48 Multi-disciplinary Centres for Prenatal Diagnosis across the country, including four in Paris and  
6 five in its surrounding suburbs. By law, the severity of the foetal anomaly must be certified by two  
7 experts from these centres in order for the TOPFA to be authorized. For cases in which either TOPFA  
8 is not an appropriate decision (“curable” or not sufficiently severe anomalies) or for which women  
9 opt to continue their pregnancy even if the experts consider that TOPFA is an acceptable option, the  
10 centres play an important role in the perinatal management of cases to optimize care for both  
11 mothers and their affected newborns. Mandates for the exclusive coordination of prenatal diagnosis  
12 services by these multi-disciplinary centres are likely to have contributed to a wider availability of  
13 high-quality prenatal diagnostic services in our population. Moreover, there is a high concentration  
14 of specialized services for postnatal care of newborns with CHD, including NICUs, PICUs and cardiac  
15 surgery centres. This, in turn, has the effect that the time required for transfers (due to relative  
16 geographical proximity) is generally not very long even if we did not specifically address this question  
17 in our study. Hence, even cases with postnatal diagnosis can usually be transferred to tertiary,  
18 specialised centres for optimal care. Therefore, the effect of prenatal diagnosis may be relatively  
19 lower in our population vs. one in say urban areas or in general when one or only a few tertiary  
20 centres are available for transfer of patients with CHD. Finally, it is worth noting that, at least for the  
21 time being, routine pulse oximetry is not practiced in France. There is, however, an ongoing study in  
22 the Aquitaine area for looking at the impact of pulse oximetry for newborns with CHD.

23  
24  
25  
26  
27  
28  
29  
30  
31  
32  
33  
34  
35  
36  
37  
38  
39  
40  
41  
42  
43  
44  
45  
46 Given these considerations, the extent to which our results may be generalizable to other regions in  
47 France, in particular rural areas where availability of high quality, specialist services is less than those  
48 in Paris is difficult to know. The question of generalizability of our results to other countries in Europe  
49 or elsewhere is also an open one and requires further study.  
50  
51  
52  
53  
54  
55  
56  
57  
58  
59  
60

1  
2  
3  
4  
5 We should emphasize that interpreting these results as proof for a general lack of efficacy of prenatal  
6 diagnosis for optimal management and outcomes of CHD would clearly be misguided and misleading.  
7  
8  
9 Instead, our results imply that survival may no longer be the most relevant outcome, or the best  
10 criterion, for evaluating the impact of prenatal diagnosis on outcomes of CHD. Indeed, as recent  
11 studies have shown, prenatal diagnosis can improve the neuro-developmental outcomes of  
12 newborns with CHD, for example in case of the TGA<sup>19-22</sup>. What is needed now is to assess whether  
13 these results that are based on hospital-based studies from specialized centres also hold at the  
14 population-level and for other CHD. It would also be worthwhile to see whether prenatal diagnosis  
15 may continue to be associated with better survival outcomes in settings where specialized services  
16 are not readily available and require in-utero or early transfer of newborns to distant referral  
17 centres. Moreover, the underlying clinical and pathophysiological mechanisms that may explain the  
18 beneficial effects of prenatal diagnosis on outcomes of newborns with CHD require further study<sup>23</sup>.  
19  
20  
21  
22  
23  
24  
25  
26  
27  
28  
29  
30  
31  
32  
33  
34  
35  
36  
37  
38  
39  
40  
41  
42  
43  
44  
45  
46  
47  
48  
49  
50  
51  
52  
53  
54  
55  
56  
57  
58  
59  
60

#### Reference List

- (1) Dolk H, Loane M, Garne E. Congenital Heart Defects in Europe: Prevalence and Perinatal Mortality, 2000 to 2005. *Circulation* 2011;123:841-849.
- (2) Lee K, Khoshnood B, Chen L, Wall SN, Cromie WJ, Mittendorf RL. Infant mortality from congenital malformations in the United States, 1970-1997. *Obstet Gynecol* 2001;98:620-627.
- (3) EUROCAT Central Registry UoU. EUROCAT Special Report: Congenital Heart Defects in Europe, 2000 - 2005. 2009. <http://www.eurocat-network.eu/content/Special-Report-CHD.pdf>
- (4) Khoshnood B, Lelong N, Houyel L et al. Prevalence, timing of diagnosis and mortality of newborns with congenital heart defects: a population-based study. *Heart* 2012;98:1667-1673.
- (5) Bonnet D, Coltri A, Butera G et al. Detection of transposition of the great arteries in fetuses reduces neonatal morbidity and mortality. *Circulation* 1999;99:916-918.

- 1
- 2
- 3 (6) Khoshnood B, De VC, Vodovar V et al. Trends in prenatal diagnosis, pregnancy termination,  
4 and perinatal mortality of newborns with congenital heart disease in France, 1983-2000: a  
5 population-based evaluation. *Pediatrics* 2005;115:95-101.
- 6
- 7 (7) Wernovsky G, Shillingford AJ, Gaynor JW. Central nervous system outcomes in children with  
8 complex congenital heart disease. *Curr Opin Cardiol* 2005;20:94-99.
- 9
- 10 (8) Blyth M, Howe D, Gnanapragasam J, Wellesley D. The hidden mortality of transposition of  
11 the great arteries and survival advantage provided by prenatal diagnosis. *BJOG*  
12 2008;115:1096-1100.
- 13
- 14 (9) Calderon J, Angeard N, Moutier S, Plumet MH, Jambaque I, Bonnet D. Impact of prenatal  
15 diagnosis on neurocognitive outcomes in children with transposition of the great arteries. *J*  
16 *Pediatr* 2012;161:94-98.
- 17
- 18 (10) Holland BJ, Myers JA, Woods CR, Jr. Prenatal diagnosis of critical congenital heart disease  
19 reduces risk of death from cardiovascular compromise prior to planned neonatal cardiac  
20 surgery: a meta-analysis. *Ultrasound Obstet Gynecol* 2015;45:631-638.
- 21
- 22 (11) Kumar RK, Newburger JW, Gauvreau K, Kamenir SA, Hornberger LK. Comparison of outcome  
23 when hypoplastic left heart syndrome and transposition of the great arteries are diagnosed  
24 prenatally versus when diagnosis of these two conditions is made only postnatally. *Am J*  
25 *Cardiol* 1999;83:1649-1653.
- 26
- 27 (12) Mahle WT, Clancy RR, McGaurn SP, Goin JE, Clark BJ. Impact of prenatal diagnosis on survival  
28 and early neurologic morbidity in neonates with the hypoplastic left heart syndrome.  
29 *Pediatrics* 2001;107:1277-1282.
- 30
- 31 (13) Tworetzky W, McElhinney DB, Reddy VM, Brook MM, Hanley FL, Silverman NH. Improved  
32 surgical outcome after fetal diagnosis of hypoplastic left heart syndrome. *Circulation*  
33 2001;103:1269-1273.
- 34
- 35 (14) Oster ME, Kim CH, Kusano AS et al. A population-based study of the association of prenatal  
36 diagnosis with survival rate for infants with congenital heart defects. *Am J Cardiol*  
37 2014;113:1036-1040.
- 38
- 39 (15) Li YF, Zhou KY, Fang J, Wang C, Hua YM, Mu DZ. Efficacy of prenatal diagnosis of major  
40 congenital heart disease on perinatal management and perioperative mortality: a meta-  
41 analysis. *World J Pediatr* 2016;12:298-307.
- 42
- 43 (16) Wright LK, Ehrlich A, Stauffer N, Samai C, Kogon B, Oster ME. Relation of prenatal diagnosis  
44 with one-year survival rate for infants with congenital heart disease. *Am J Cardiol*  
45 2014;113:1041-1044.
- 46
- 47 (17) Houyel L, Khoshnood B, Anderson RH et al. Population-based evaluation of a suggested  
48 anatomic and clinical classification of congenital heart defects based on the International  
49 Paediatric and Congenital Cardiac Code. *Orphanet J Rare Dis* 2011;6:64.
- 50
- 51 (18) Franklin RC, Jacobs JP, Krogmann ON et al. Nomenclature for congenital and paediatric  
52 cardiac disease: historical perspectives and The International Pediatric and Congenital  
53 Cardiac Code. *Cardiol Young* 2008;18 Suppl 2:70-80.
- 54
- 55
- 56
- 57
- 58
- 59
- 60

- 1  
2  
3 (19) Calderon J, Bonnet D, Courtin C, Concordet S, Plumet MH, Angeard N. Executive function and  
4 theory of mind in school-aged children after neonatal corrective cardiac surgery for  
5 transposition of the great arteries. *Dev Med Child Neurol* 2010;52:1139-1144.  
6  
7 (20) Calderon J, Angeard N, Moutier S, Plumet MH, Jambaque I, Bonnet D. Impact of prenatal  
8 diagnosis on neurocognitive outcomes in children with transposition of the great arteries. *J*  
9 *Pediatr* 2012;161:94-98.  
10  
11 (21) Calderon J, Jambaque I, Bonnet D, Angeard N. Executive functions development in 5- to 7-  
12 year-old children with transposition of the great arteries: a longitudinal study. *Dev*  
13 *Neuropsychol* 2014;39:365-384.  
14  
15 (22) Calderon J, Angeard N, Pinabiaux C, Bonnet D, Jambaque I. Facial expression recognition and  
16 emotion understanding in children after neonatal open-heart surgery for transposition of the  
17 great arteries. *Dev Med Child Neurol* 2014;56:564-571.  
18  
19 (23) Peyvandi S, De S, V, Chakkarapani E et al. Association of Prenatal Diagnosis of Critical  
20 Congenital Heart Disease With Postnatal Brain Development and the Risk of Brain Injury.  
21 *JAMA Pediatr* 2016;170:e154450.  
22  
23  
24  
25  
26  
27  
28  
29  
30  
31  
32  
33  
34  
35  
36  
37  
38  
39  
40  
41  
42  
43  
44  
45  
46  
47  
48  
49  
50  
51  
52  
53  
54  
55  
56  
57  
58  
59  
60

1  
2  
3  
4 Exclusive license: The Corresponding Author has the right to grant on behalf of all authors  
5 and does grant on behalf of all authors, an exclusive licence on a worldwide basis to the BMJ  
6 Publishing Group Ltd to permit this article (if accepted) to be published in BMJ editions and  
7 any other BMJPGJL products and sublicenses such use and exploit all subsidiary rights, as set  
8 out in our licence.  
9

#### 10 11 12 **Acknowledgements and Disclosure section**

13  
14 B Khoshnood and N Lelong had full access to the data and take responsibility for the integrity of the  
15 data and the accuracy of the data analysis.  
16

17  
18 The EPICARD study was approved by the French National Committee of Information and Freedom (*Commission*  
19 *nationale de l'informatique et des libertés*).  
20

21 **Funding:** This work was supported by two grants from the French Ministry of Health (PHRC 2004 and 2008).  
22 Additional funding was provided by the AREMCAR (Association pour la Recherche et l'Etude des Maladies  
23 Cardiovasculaires) association.  
24

25 The funding sources had no role in the study design, data collection, data interpretation, or the writing of the  
26 manuscript.  
27

28 **Data sharing statement:** No additional data available.  
29  
30  
31

#### 32 **Conflicts of interest:**

33  
34 The authors have no conflicts of interest to declare. The funding sources had no role in the study  
35 design, data collection, data interpretation, or the writing of the manuscript.  
36  
37  
38

#### 39 **Contributors:**

40  
41 B. Khoshnood and F. Goffinet conceived the study. N. Lelong and B. Khoshnood with help from  
42 Morgane Ballon conducted the statistical analysis with the assistance of Morgane Ballon and in  
43 consultation with F. Goffinet. L. Houyel, D. Bonnet and JM Jouannic provided clinical expertise. B.  
44 Khoshnood wrote the first draft of the article. All co-authors made substantial contributions to the  
45 interpretation of results and revisions of the manuscript.  
46  
47

#### 48 **Funding:**

49  
50 This work was supported by two grants from the French Ministry of Health (PHRC 2004 and 2008).  
51 Additional funding was provided by the AREMCAR Association.  
52  
53  
54  
55  
56  
57  
58  
59  
60

1  
2  
3  
4  
5  
6  
7  
8  
9  
10  
11  
12  
13  
14  
15  
16  
17  
18  
19  
20  
21  
22  
23  
24  
25  
26  
27  
28  
29  
30  
31  
32  
33  
34  
35  
36  
37  
38  
39  
40  
41  
42  
43  
44  
45  
46  
47  
48  
49

Table 1 : Prenatal diagnosis for four specific CHD, EPICARD population-based cohort study

| Congenital Heart Defect                              | Prenatal Diagnosis <sup>(1)</sup> |      |           | % TOPFA <sup>(2)</sup> |           |
|------------------------------------------------------|-----------------------------------|------|-----------|------------------------|-----------|
|                                                      | N                                 | %    | 95% CI    | %                      | 95% CI    |
| Functionally Univentricular Heart <sup>(1)</sup>     | 132                               | 94.7 | 89.4-97.8 | 70.4                   | 61.6-78.2 |
| d-Transposition of the great arteries <sup>(1)</sup> | 85                                | 70.6 | 59.7-80.0 | 3.3                    | 0.4-11.5  |
| Tetralogy of Fallot <sup>(1)</sup>                   | 60                                | 68.3 | 55.0-79.7 | 12.2                   | 4.1-26.2  |
| Coarctation of the aorta <sup>(1)</sup>              | 77                                | 42.9 | 31.6-54.6 | 9.1                    | 1.9-24.3  |

(1) Cases with the specific IPCCC code for the given CHD, whether or not other CHD codes were also included; all cases with chromosomal or others anomalies were excluded

(2) Terminations of Pregnancy for Foetal Anomaly (TOPFA) among prenatally diagnoses cases

Table 2 : Pregnancy outcomes for four specific CHD, EPICARD population-based cohort study

| Congenital Heart Defect                              | Live births |      |           | TOPFA <sup>(2)</sup> |           | Stillbirths |          |
|------------------------------------------------------|-------------|------|-----------|----------------------|-----------|-------------|----------|
|                                                      | N           | %    | 95% CI    | %                    | 95% CI    | %           | 95% CI   |
| Functionally univentricular heart <sup>(1)</sup>     | 132         | 29.5 | 21.9-38.1 | 66.7                 | 57.9-74.6 | 3.8         | 1.2-8.6  |
| d-Transposition of the great arteries <sup>(1)</sup> | 85          | 95.2 | 88.4-98.7 | 2.4                  | 0.3-8.2   | 2.4         | 0.3-8.2  |
| Tetralogy of Fallot <sup>(1)</sup>                   | 60          | 90.0 | 79.5-96.2 | 8.3                  | 2.8-18.4  | 1.7         | 0.04-8.9 |
| Coarctation of the aorta <sup>(1)</sup>              | 77          | 94.8 | 87.2-98.6 | 3.9                  | 0.8-11.0  | 1.3         | 0.03-7.0 |

(1) Cases with the specific IPCCC code for the given CHD, whether or not other CHD codes were also included; all cases with chromosomal or others anomalies were excluded

(2) Terminations of Pregnancy for Fetal Anomaly (TOPFA) among the overall number of cases (i.e number of TOPFA divided by the total number of cases)

1  
2  
3  
4  
5  
6  
7  
8  
9  
10  
11  
12  
13  
14  
15  
16  
17  
18  
19  
20  
21  
22  
23  
24  
25  
26  
27  
28  
29  
30  
31  
32  
33  
34  
35  
36  
37  
38  
39  
40  
41  
42  
43  
44  
45  
46  
47  
48  
49

Table 3 : Association between prenatal diagnosis and risk of infant mortality for four specific CHD, EPICARD population-based cohort study

| Congenital Heart Defect                              | Prenatal Diagnosis | Infant mortality |                |      |           |            |            |
|------------------------------------------------------|--------------------|------------------|----------------|------|-----------|------------|------------|
|                                                      |                    | N <sup>#</sup>   | n <sup>‡</sup> | %    | 95% CI    | Risk Ratio | 95% CI     |
| Functionally univentricular heart <sup>(1)</sup>     | No                 | 7                | 3              | 42.9 | 9.9-81.6  |            |            |
|                                                      | Yes                | 32               | 17             | 53.1 | 34.7-70.9 | 1.2        | 0.5 - 3.1  |
| d-Transposition of the great arteries <sup>(1)</sup> | No                 | 24               | 1              | 4.2  | 0.1-21.1  |            |            |
|                                                      | Yes                | 57               | 5              | 8.8  | 2.9-19.3  | 2.1        | 0.3 - 17.1 |
| Tetralogy of Fallot <sup>(1)</sup>                   | No                 | 18               | 2              | 11.1 | 1.4-34.7  |            |            |
|                                                      | Yes                | 36               | 1              | 2.8  | 0.07-14.5 | 0.3        | 0.02-2.6   |
| Coarctation of the aorta <sup>(1)</sup>              | No                 | 44               | 3              | 6.8  | 1.4-18.7  |            |            |
|                                                      | Yes                | 29               | 2              | 6.9  | 0.8-22.8  | 1.0        | 0.2-5.7    |

(1) Cases with the specific IPCCC code for the given CHD, whether or not other CHD codes were also included; all cases with chromosomal or others anomalies were excluded

<sup>#</sup>N = number of live births (denominator data)

<sup>‡</sup>n= number of deaths (numerator data)



Figure 1: Flow chart for the study population

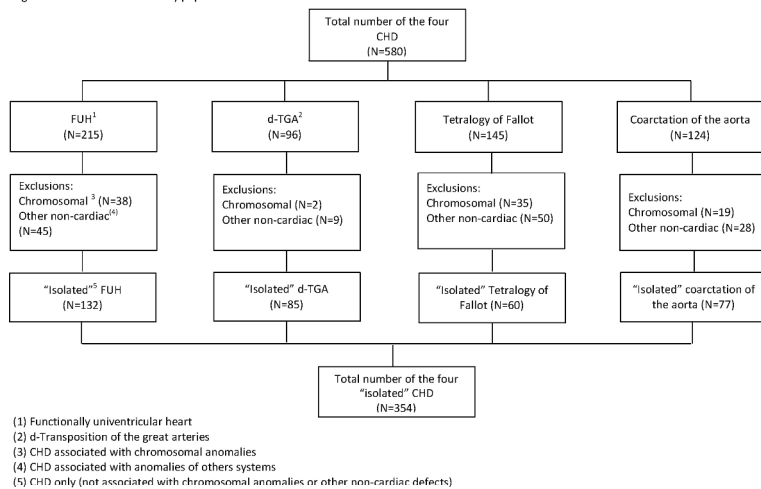

Figure 1. Flow chart for the study population

297x209mm (300 x 300 DPI)

iew only

STROBE Statement—Checklist of items that should be included in reports of *cohort studies*

|                                                                                                                                                                                                                                                            | Item No | Recommendation                                                                                                                                                                                                                                                      |
|------------------------------------------------------------------------------------------------------------------------------------------------------------------------------------------------------------------------------------------------------------|---------|---------------------------------------------------------------------------------------------------------------------------------------------------------------------------------------------------------------------------------------------------------------------|
| <b>Title and abstract</b><br>Pages 1 and 2<br>(population-based, prospective cohort study in France)                                                                                                                                                       | 1       | (a) Indicate the study's design with a commonly used term in the title or the abstract<br>(b) Provide in the abstract an informative and balanced summary of what was done and what was found                                                                       |
| <b>Introduction</b>                                                                                                                                                                                                                                        |         |                                                                                                                                                                                                                                                                     |
| Background/rationale<br>Page 5                                                                                                                                                                                                                             | 2       | Explain the scientific background and rationale for the investigation being reported                                                                                                                                                                                |
| Objectives – Page 6.                                                                                                                                                                                                                                       | 3       | State specific objectives, including any prespecified hypotheses                                                                                                                                                                                                    |
| <b>Methods</b>                                                                                                                                                                                                                                             |         |                                                                                                                                                                                                                                                                     |
| Study design – see Data source (pp. 7-8)                                                                                                                                                                                                                   | 4       | Present key elements of study design early in the paper                                                                                                                                                                                                             |
| Setting – see Data source, p. 8                                                                                                                                                                                                                            | 5       | Describe the setting, locations, and relevant dates, including periods of recruitment, exposure, follow-up, and data collection                                                                                                                                     |
| Participants<br>See Study Population (pp. 6-7) and Flow diagram, Figure 1, page 16                                                                                                                                                                         | 6       | (a) Give the eligibility criteria, and the sources and methods of selection of participants. Describe methods of follow-up<br>(b) For matched studies, give matching criteria and number of exposed and unexposed                                                   |
| Pages 7-8, including Statistical Analysis                                                                                                                                                                                                                  | 7       | Clearly define all outcomes, exposures, predictors, potential confounders, and effect modifiers. Give diagnostic criteria, if applicable                                                                                                                            |
| Data sources/ measurement<br>Pages 7-8                                                                                                                                                                                                                     | 8*      | For each variable of interest, give sources of data and details of methods of assessment (measurement). Describe comparability of assessment methods if there is more than one group                                                                                |
| Bias<br>Excluded cases associated with chromosomal anomalies / non-cardiac anomalies, including syndromes (p. 8)<br>Acknowledged and discussed the possibility of variable severity for cases prenatally vs. postnatally diagnosed (Discussion, pp. 10-11) | 9       | Describe any efforts to address potential sources of bias                                                                                                                                                                                                           |
| Study size<br>p. 8 – study population                                                                                                                                                                                                                      | 10      | Explain how the study size was arrived at                                                                                                                                                                                                                           |
| Quantitative variables<br>Our variables were categorical.                                                                                                                                                                                                  | 11      | Explain how quantitative variables were handled in the analyses. If applicable, describe which groupings were chosen and why                                                                                                                                        |
| Statistical methods<br>Page 8.<br>Exploratory analysis described briefly in the Discussion (p. 11) for looking at the potential impact of cardiac anomalies associated with the four examined in our study (detailed results available from authors).      | 12      | (a) Describe all statistical methods, including those used to control for confounding<br>(b) Describe any methods used to examine subgroups and interactions<br>(c) Explain how missing data were addressed<br>(d) If applicable, explain how loss to follow-up was |

|    |                                                             |     |                                                         |
|----|-------------------------------------------------------------|-----|---------------------------------------------------------|
| 1  | No missing data for prenatal diagnosis or mortality.        |     | addressed                                               |
| 2  | Exploratory analysis referred to above.                     |     | (e) Describe any sensitivity analyses                   |
| 3  | <b>Results</b>                                              |     |                                                         |
| 4  | <b>Participants</b>                                         |     |                                                         |
| 5  | Participants                                                | 13* | (a) Report numbers of individuals at each stage of      |
| 6  | See Flow Diagram p. 16                                      |     | study—eg numbers potentially eligible, examined for     |
| 7  |                                                             |     | eligibility, confirmed eligible, included in the study, |
| 8  |                                                             |     | completing follow-up, and analysed                      |
| 9  |                                                             |     | (b) Give reasons for non-participation at each stage    |
| 10 |                                                             |     | (c) Consider use of a flow diagram                      |
| 11 | <b>Descriptive data</b>                                     |     |                                                         |
| 12 | Descriptive data                                            | 14* | (a) Give characteristics of study participants (eg      |
| 13 | Data on prenatal diagnosis, pregnancy outcomes              |     | demographic, clinical, social) and information on       |
| 14 | (TOPFA, stillbirths and live births) provided on page 9     |     | exposures and potential confounders                     |
| 15 |                                                             |     | (b) Indicate number of participants with missing data   |
| 16 | No missing data for the exposure (prenatal vs. postnatal    |     | for each variable of interest                           |
| 17 | diagnosis) or the main outcome (infant mortality)           |     | (c) Summarise follow-up time (eg, average and total     |
| 18 |                                                             |     | amount)                                                 |
| 19 | <b>Outcome data</b>                                         |     |                                                         |
| 20 | Outcome data                                                | 15* | Report numbers of outcome events or summary             |
| 21 | p. 9                                                        |     | measures over time                                      |
| 22 | <b>Main results</b>                                         |     |                                                         |
| 23 | Main results                                                | 16  | (a) Give unadjusted estimates and, if applicable,       |
| 24 | p.9 and Tables 1-3                                          |     | confounder-adjusted estimates and their precision       |
| 25 |                                                             |     | (eg, 95% confidence interval). Make clear which         |
| 26 |                                                             |     | confounders were adjusted for and why they were         |
| 27 |                                                             |     | included                                                |
| 28 |                                                             |     | (b) Report category boundaries when continuous          |
| 29 |                                                             |     | variables were categorized                              |
| 30 |                                                             |     | (c) If relevant, consider translating estimates of      |
| 31 |                                                             |     | relative risk into absolute risk for a meaningful time  |
| 32 |                                                             |     | period                                                  |
| 33 | <b>Other analyses</b>                                       |     |                                                         |
| 34 | Other analyses                                              | 17  | Report other analyses done—eg analyses of               |
| 35 | Exploratory analysis referred to above                      |     | subgroups and interactions, and sensitivity analyses    |
| 36 | <b>Discussion</b>                                           |     |                                                         |
| 37 | <b>Key results</b>                                          |     |                                                         |
| 38 | Key results paragraphs 1-2, Discussion, pp. 9-10            | 18  | Summarise key results with reference to study           |
| 39 |                                                             |     | objectives                                              |
| 40 | <b>Limitations</b>                                          |     |                                                         |
| 41 | Limitations                                                 | 19  | Discuss limitations of the study, taking into account   |
| 42 | Discussion, pp.10-11                                        |     | sources of potential bias or imprecision. Discuss both  |
| 43 |                                                             |     | direction and magnitude of any potential bias           |
| 44 | <b>Interpretation</b>                                       |     |                                                         |
| 45 | Interpretation                                              | 20  | Give a cautious overall interpretation of results       |
| 46 | pp. 9-10, p. 13                                             |     | considering objectives, limitations, multiplicity of    |
| 47 |                                                             |     | analyses, results from similar studies, and other       |
| 48 |                                                             |     | relevant evidence                                       |
| 49 | <b>Generalisability</b>                                     |     |                                                         |
| 50 | Generalisability                                            | 21  | Discuss the generalisability (external validity) of the |
| 51 | p. 12                                                       |     | study results                                           |
| 52 | <b>Other information</b>                                    |     |                                                         |
| 53 | <b>Funding</b>                                              |     |                                                         |
| 54 | Page 16 (the funding sources had no role in the study       | 22  | Give the source of funding and the role of the          |
| 55 | design, data collection, data interpretation, or writing of |     | funders for the present study and, if applicable, for   |
| 56 | the manuscript).                                            |     | the original study on which the present article is      |
| 57 |                                                             |     | based                                                   |
| 58 |                                                             |     |                                                         |
| 59 |                                                             |     |                                                         |
| 60 |                                                             |     |                                                         |

1 \*Give information separately for exposed and unexposed groups.  
2

3 **Note:** An Explanation and Elaboration article discusses each checklist item and gives methodological background and  
4 published examples of transparent reporting. The STROBE checklist is best used in conjunction with this article (freely  
5 available on the Web sites of PLoS Medicine at <http://www.plosmedicine.org/>, Annals of Internal Medicine at  
6 <http://www.annals.org/>, and Epidemiology at <http://www.epidem.com/>). Information on the STROBE Initiative is  
7 available at <http://www.strobe-statement.org>.  
8  
9  
10  
11  
12  
13  
14  
15  
16  
17  
18  
19  
20  
21  
22  
23  
24  
25  
26  
27  
28  
29  
30  
31  
32  
33  
34  
35  
36  
37  
38  
39  
40  
41  
42  
43  
44  
45  
46  
47  
48  
49  
50  
51  
52  
53  
54  
55  
56  
57  
58  
59  
60

For peer review only
